# Supplementary material
Source: MDPI journal article supplement (https://www.mdpi.com/2073-4395/5/4/555)
Supplement: s1 [file s1]

**Supplementary Materials**

**Table S1.** Genome sequences for two SCAR markers designed by Milla *et al*. (2005).

| SCAR1 | GTCTACGGCAAGGGGAGATATTAAGTTGAAGACGAATCAAAAGAAATTTAAATAGATGGAGTAGCTCTGATAGTAGACCGAATCGGCAGGGTGAAGGTATGCTTAATTTTTGGTATGTAATCGAAGGTAATGAGTTCATACAGGTGATTTGCAATAATGCTCTTGGGTTTTGACGACTTGCTTAGCGTGGTTTAGTTATAAGGATTCAGTCATGGAAGTGTAGTTATACAAATAGAATTGGGAGTAGTTCATGTTGATTGCTGCCGTAGAC |
| --- | --- |
| SCAR2 | CTGAGTTTGGCCGAATAGCATCACTCTTCGTTTAATTAGTATAGTATATGTATATGTGTTTTATGGAAAATGATGAAGCACGCAATCTTGGGAAGGTAAGACAAATAAATTAGTGAGAGAGAATTGTTGAAAAAATGAGTTTAAAACGAAAAATCTGCCAAAGGATATATATGGAAAACGAAAATGCACAAATATCCATTATGCCCTCAAAAGCCGTGCGAAGTTATCATTATACCCCATTTAGGACGTTTG |


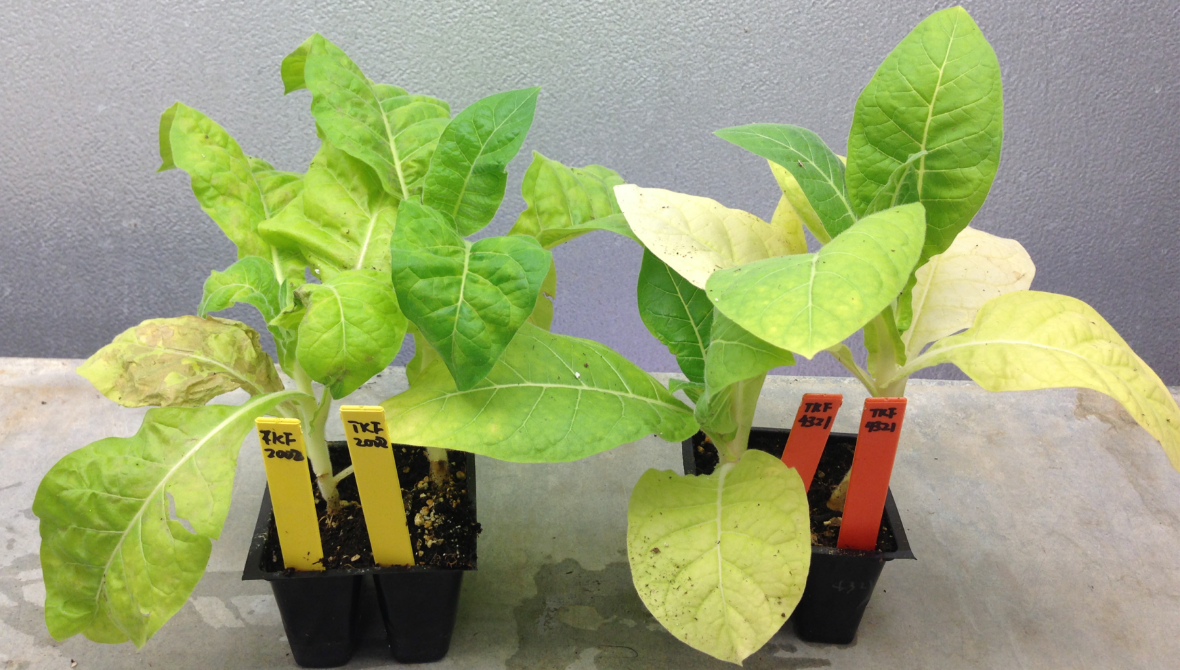


TKF 2002

TKF 4321

**Figure S1.** Compatible and incompatible tobacco-*P. tabacina* interactions.


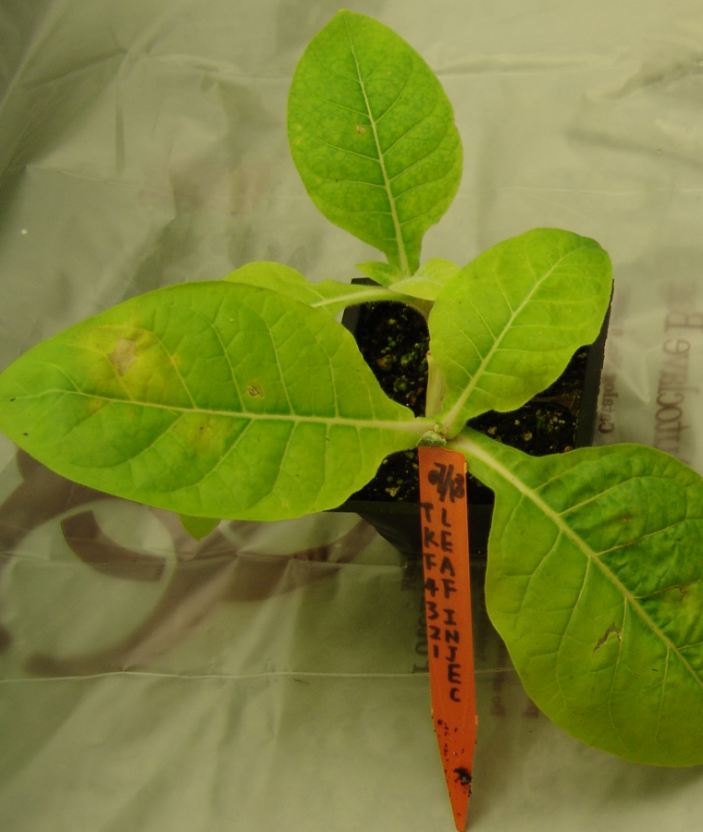


TKF 4321


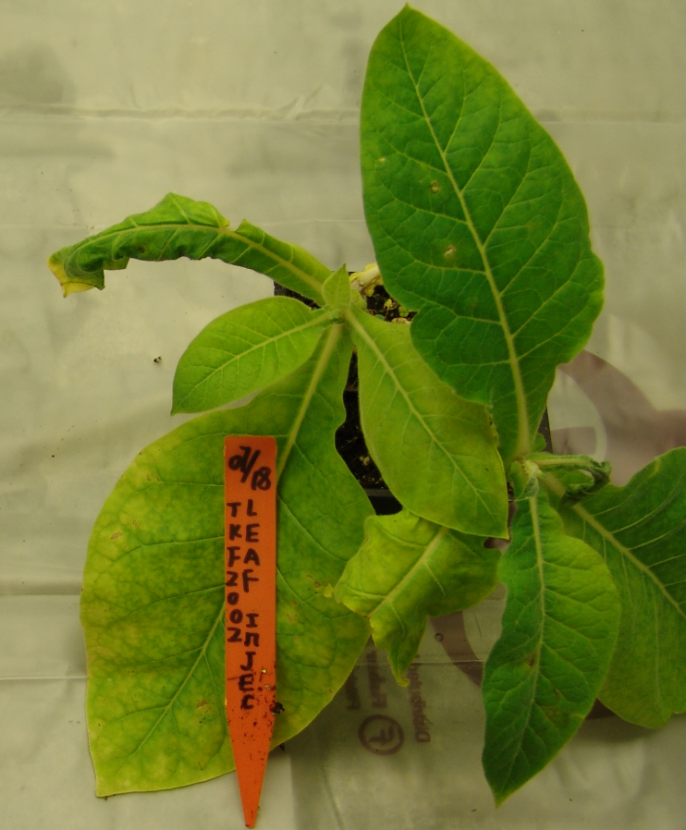


TKF 2002

**Figure S2.** HR-induced chlorosis in resistant parental line TKF 4321.


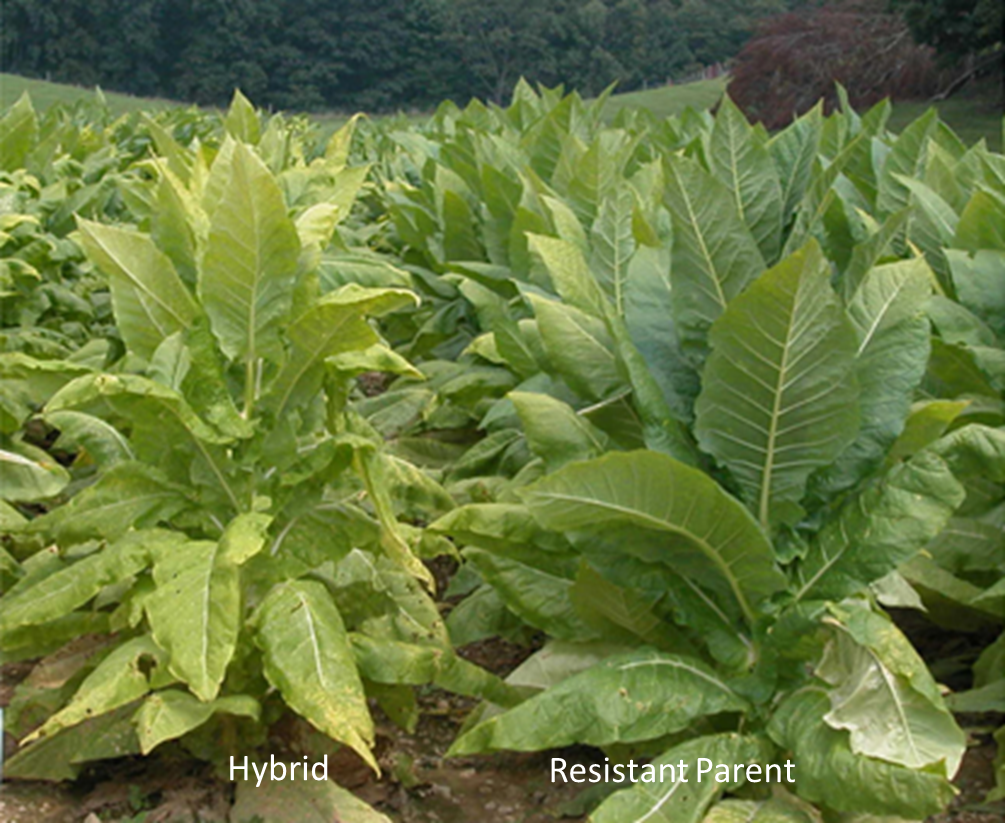


**Figure S3.** Intermediate resistance to blue mold in hybrid lines under field condition.


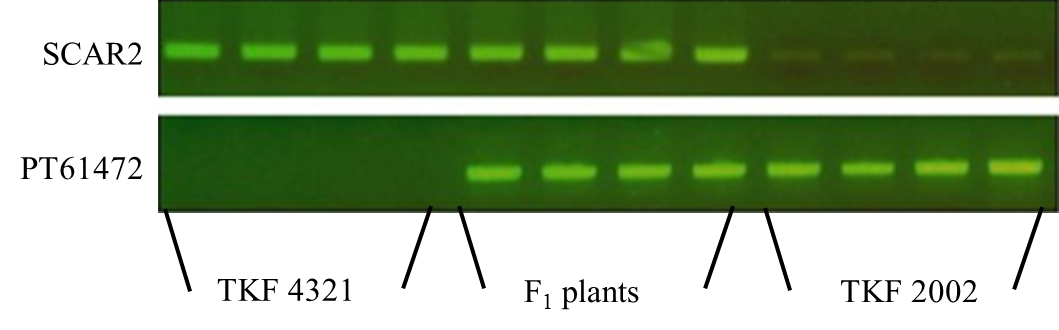


**Figure S4.** Coupling SCAR marker and repulsion SSR marker linked to blue mold resistance. Heterozygosity of blue mold resistance can be distinguished by using both markers.
